# Supplementary material
Source: publisher figshare collection journal article supplement (https://acs.figshare.com/ndownloader/files/25348339)
Supplement: Supplementary file 1 [file 25348339]

## Supporting information

### **Kinetic Study and Degradation Mechanism of Glycidyl Esters in Both Palm Oil and Chemical Models during High-Temperature Heating**

Weiwei Cheng<sup>†,‡,§,\*</sup>, Guoqin Liu<sup>||</sup>, Zheng Guo<sup>⊥</sup>, Feng Chen<sup>†,‡,§</sup>, Ka-Wing Cheng<sup>†,‡,§,\*</sup>

<sup>†</sup> *Institute for Advanced Study, <sup>‡</sup> Shenzhen Key Laboratory of Marine Microbiome Engineering, and <sup>§</sup> Institute for Innovative Development of Food Industry, Shenzhen University, Shenzhen 518060, China*

<sup>||</sup> *School of Food Science and Engineering, South China University of Technology, Guangzhou 510641, China*

<sup>⊥</sup> *Department of Engineering, Faculty of Science and Technology, Aarhus University, 8000 Aarhus C, Denmark*

\*Corresponding author at: No. 3688, Nanhai Road, Nanshan District, Shenzhen 518060, China.

E-mail address: kwcheng@szu.edu.cn (Ka-Wing Cheng)

cheng4677@126.com / cheng@szu.edu.cn (Weiwei Cheng)

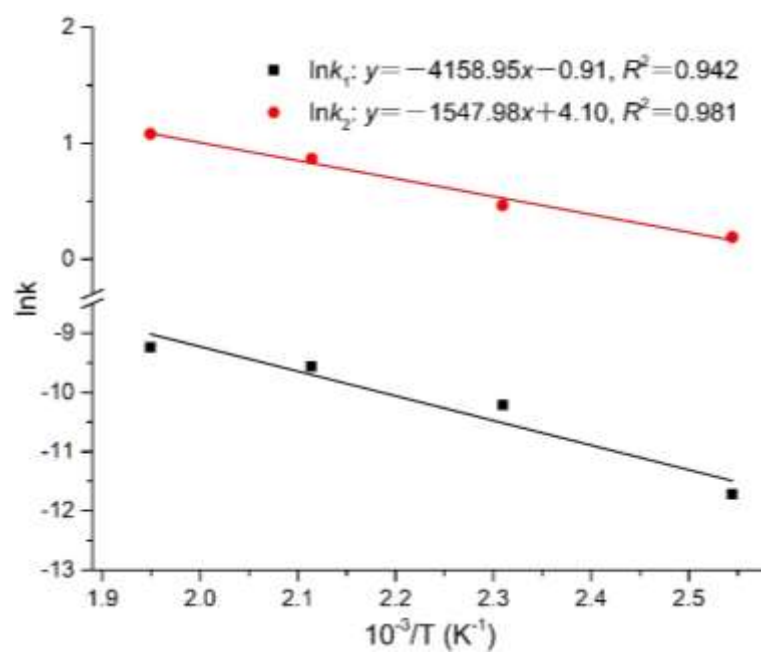

**Figure S1.** Arrhenius plot of GE formation in palm oil.

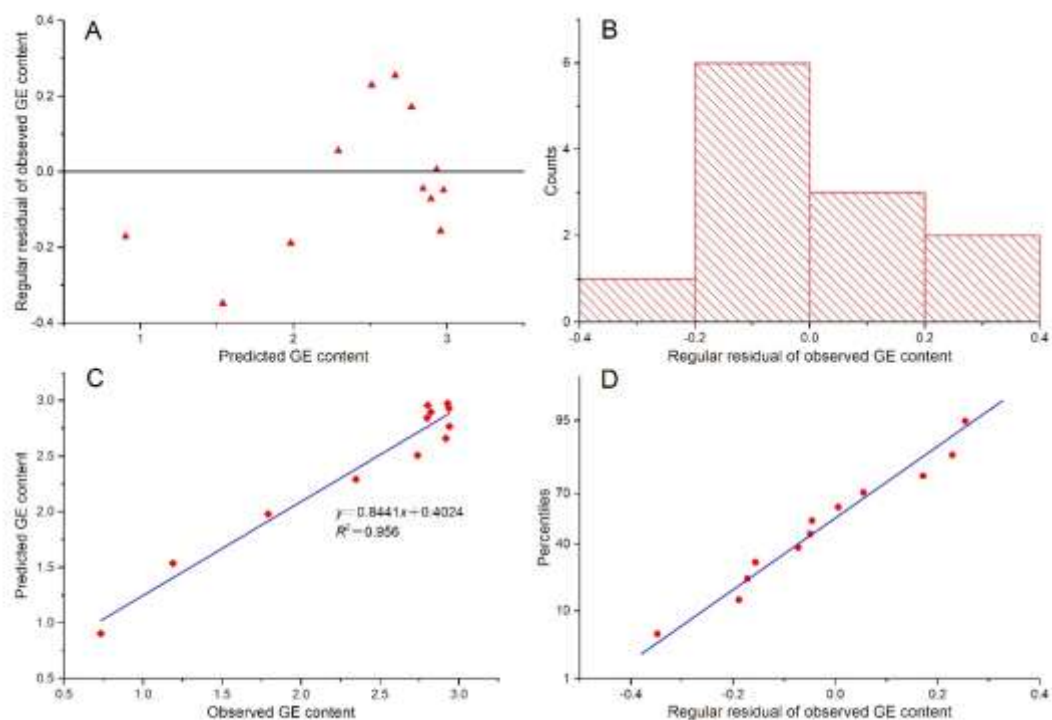

**Figure S2.** Assessment of pseudo-first-order reaction model of GE formation in palm oil at 200 °C, (A) residuals vs predicted response, (B) run numbers vs residuals, (C) predicted vs actual values, (D) normal plot of residuals.
